1 **Title: Did a plant-herbivore arms race drive chemical diversity in *Euphorbia*?**

2 **Authors:** M. Ernst<sup>1,2,3</sup>, L.-F. Nothias<sup>2,3</sup>, J. J. J. van der Hooft<sup>2,3,4</sup>, R. R. Silva<sup>2,3</sup>, C. H. Saslis-  
3 Lagoudakis<sup>1</sup>, O. M. Grace<sup>5</sup>, K. Martinez-Swatson<sup>1</sup>, G. Hassemer<sup>1</sup>, L. A. Funez<sup>7</sup>, H. T.  
4 Simonsen<sup>6</sup>, M. H. Medema<sup>4</sup>, D. Staerk<sup>8</sup>, N. Nilsson<sup>9</sup>, P. Lovato<sup>9</sup>, P. C. Dorrestein<sup>2,3,10\*</sup> & N.  
5 Rønsted<sup>1\*</sup>

6 **Affiliations:**

7  
8 <sup>1</sup>Natural History Museum of Denmark, Faculty of Science, University of Copenhagen, Øster  
9 Farimagsgade 5, DK-1353 Copenhagen K, Denmark.

10 <sup>2</sup>Collaborative Mass Spectrometry Innovation Center, Skaggs School of Pharmacy and  
11 Pharmaceutical Sciences, University of California, San Diego, La Jolla, CA 92093, USA.

12 <sup>3</sup>Skaggs School of Pharmacy and Pharmaceutical Sciences, University of California, San  
13 Diego, La Jolla, CA 92093, USA.

14 <sup>4</sup>Bioinformatics Group, Department of Plant Sciences, Wageningen University, 6708 PB,  
15 Wageningen, The Netherlands.

16 <sup>5</sup>Comparative Plant & Fungal Biology, Royal Botanic Gardens, Kew, Surrey TW9 3AE, United  
17 Kingdom.

18 <sup>6</sup>Department of Biotechnology and Biomedicine, Technical University of Denmark, Søtofts  
19 Plads, DK-2800 Kgs. Lyngby, Denmark.

20 <sup>7</sup>Herbário Dr. Roberto Miguel Klein (FURB), Regional University of Blumenau, Campus 1,  
21 89012-900, Blumenau, SC, Brazil.

22 <sup>8</sup>Department of Drug Design and Pharmacology, University of Copenhagen, Universitetsparken  
23 2, DK-2100 Copenhagen, Denmark.

24 <sup>9</sup>Front End Innovation, LEO Pharma A/S, Industriparken 55, DK-2750 Ballerup, Denmark.

25 <sup>10</sup>Center for Microbiome Innovation, University of California, San Diego, La Jolla, CA  
26 92093, USA.

27 \*Correspondence to: [nronsted@snm.ku.dk](mailto:nronsted@snm.ku.dk) and [pdorrestein@ucsd.edu](mailto:pdorrestein@ucsd.edu)

28 **Abstract:**

29 The genus *Euphorbia* is among the most diverse and species-rich plant genera on Earth,  
30 exhibiting a near-cosmopolitan distribution and extraordinary chemical diversity, especially  
31 across highly toxic macro- and polycyclic diterpenoids. However, very little is known about  
32 drivers and evolutionary origins of chemical diversity within *Euphorbia*. Here, we investigate  
33 43 *Euphorbia* species to understand how geographic separation over evolutionary time has  
34 impacted chemical differentiation. We show that the structurally highly diverse *Euphorbia*  
35 diterpenoids are significantly reduced in species native to the Americas, compared to the  
36 Eurasian and African continents, where the genus originated. The localization of these  
37 compounds to young stems and roots suggest ecological relevance in herbivory defense and  
38 immunomodulatory defense mechanisms match diterpenoid levels, indicating chemo-  
39 evolutionary adaptation to reduced herbivory pressure.

40 **One Sentence Summary:**

41 Global chemo-evolutionary adaptation of *Euphorbia* affected immunomodulatory defense  
42 mechanisms.

43 **Main Text:**

44 *Euphorbia* is among the most diverse and species-rich plant genera on Earth, exhibiting  
45 a near-cosmopolitan distribution and extraordinary chemical diversity among 2,000 species (1-  
46 3). The genus originated in Africa approximately 48 million years ago and through two single  
47 long-distance dispersal events 30 and 25 million years ago, expanded to the American  
48 continents (Fig. 1) (1-2). *Euphorbia* chemical diversity is characterized by an extraordinary  
49 diversity of macro- and polycyclic diterpenoids, biosynthetically derived from a head-to-tail  
50 cyclization of the tetraprenyl pyrophosphate precursor (3, 4). These compounds play an  
51 important ecological role as feeding deterrents and have shown exclusive occurrence and  
52 chemotaxonomic relevance in the plant families Euphorbiaceae and Thymelaceae (3, 5-8).  
53 However, the chemo-evolutionary transitions driving chemical diversity within *Euphorbia* are  
54 unknown. Here, we investigate the role of biogeography in the evolution of specialized  
55 metabolite diversity in 43 *Euphorbia* species, representing the genus' global genetic diversity  
56 and biogeographic history across all continents.

57  
58 Coevolutionary theory suggests that an arms race between plants and herbivores yields  
59 increased specialized metabolite diversity (9-11). The evolution of a chemically different and  
60 biologically more active molecule increases a plant's fitness by reducing the fitness of its  
61 predator (10, 12), and the probability of producing one or more biologically active compounds  
62 may increase with phytochemical diversity (13). To assess specialized metabolite diversity in  
63 relation to the evolutionary and biogeographic history of *Euphorbia*, we subjected extracts of  
64 43 *Euphorbia* species to liquid chromatography tandem mass spectrometry (LC-MS/MS),  
65 created mass spectral molecular networks through Global Natural Products Social Molecular  
66 Networking (GNPS) (14, 15) and calculated the chemical structural and compositional  
67 similarity (CSCS) for all *Euphorbia* subgeneric clades (16). Our data show significantly higher  
68 chemical similarity among species of subgenus *Chamaesyce* compared to the mean chemical  
69 similarity among species of the remaining subgeneric clades (Fig. 2). The only species

70 clustered in the chemogram (sharing high chemical similarity) are 8 out of 9 species  
71 representing the American clade within subgenus *Chamaesyce* (Fig. 2D). Consistent with the  
72 coevolutionary theory, the reduction of chemical structural diversity in these species suggests  
73 an adaptation to reduced herbivory pressure in the Americas during the biogeographic history  
74 of the genus.

75  
76 To further understand the chemo-evolutionary relationships of *Euphorbia* at a  
77 molecular level we putatively identified major specialized metabolite classes by combining  
78 mass spectral molecular networking with *in silico* annotation tools (17-19), substructure  
79 recognition (20, 21) and automated chemical classification through ClassyFire (22). This  
80 resulted in annotated compound classes for over 30% of the compounds detected (23, 24) (Fig.  
81 S1 and S2, supplementary text). Our approach revealed many known *Euphorbia* diterpenoids  
82 as well as other metabolite classes. Out of six major structural classes of *Euphorbia*  
83 specialized metabolites (sesquiterpenoids, diterpenoids, cerebrosides, phenolics, flavonoids,  
84 and triterpenoids including steroids), four are found in our molecular networks (i.e.,  
85 diterpenoids; triterpenoids including cholestane and ergostane steroids; steroid lactones and  
86 stigmastanes; and glycosylglycerols corresponding to cerebrosides). Additionally, *in silico*  
87 structure annotation suggests the presence of tricarboxylic and benzoic acids and derivatives as  
88 well as fatty alcohols and glycosphingolipids (Fig. 2A). Among the *Euphorbia* diterpenoids,  
89 we observe different skeletal types within the same molecular families (two or more connected  
90 components of a graph) (Fig. 3). Many *Euphorbia* diterpenoid backbone skeletons are  
91 isomeric, and their respective fragmentation spectra are highly similar (25). Nonetheless, we  
92 are able to distinguish different diterpene spectral fingerprints within a molecular family by  
93 mapping Mass2Motifs on the mass spectral molecular networks. Mass2Motifs correspond to  
94 common patterns of mass fragments and neutral losses, which are extracted using  
95 unsupervised substructure discovery of the MS/MS data through MS2LDA (20, 21).  
96 Combining *in silico* structure annotation, automated chemical classification, and MS2LDA,  
97 allows us to putatively identify chemical classes within the mass spectral molecular networks,  
98 as well as chemical subclasses within molecular families (Fig. 3, Fig. S2). Consistent with  
99 previous observations of *Euphorbia* diterpenoids exhibiting anti-herbivore biological activity  
100 (5-8) and the low chemical diversity exhibited by subgenus *Chamaesyce*, we find very few to  
101 no *Euphorbia* diterpenoids in representatives of the American radiation of subgenus  
102 *Chamaesyce* (Fig. 1). Although subgenus *Chamaesyce* includes the largest American radiation  
103 within the genus *Euphorbia*, there is also a smaller American radiation within subgenus  
104 *Euphorbia* (Fig. 1). The two investigated representatives of this clade contain intermediate  
105 amounts of *Euphorbia* diterpenoids. The clade is estimated to have originated approximately 5  
106 million years later than the American radiation within subgenus *Chamaesyce* (1), which could  
107 suggest less time for adaptation to reduced herbivory pressure.

108  
109 To understand where the *Euphorbia* diterpenoids are produced within the plants, we  
110 dissected four species representing the four subgeneric clades into approximately 20 sections  
111 (23) (Fig. S10, Fig. S11). Mass spectrometric investigation revealed that diterpenoids are  
112 primarily found in the roots, in representatives of subgenera *Euphorbia* and *Athymalus* (*E.*  
113 *milii* var. *hislopii* and *E. horrida*, Fig. 4, Fig. S3, Fig. S6-S9). In the European subgenus *Esula*  
114 (*E. lathyris*), diterpenoid production is also pronounced in other plant parts, such as the young

115 stems (Fig. 4, Fig. S5). Consistent with the lower chemical diversity reported above,  
116 diterpenoid production is reduced or absent from most sections throughout the whole plant in  
117 *E. hirta*, a representative of the American clade within subgenus *Chamaesyce* (Fig 4, Fig. S4,  
118 Fig. S10). Compartmentalization of the diterpenoids to mainly young stems and roots  
119 underpins their function as anti-feeding molecules (5-8).

120

121 As anti-herbivore activity cannot be directly tested from the past continental transition,  
122 we set out to test a bioactivity that could reflect a chemical defense mechanism. One strategy  
123 of defense invoked by plants to overcome their sessile habit, is through immunomodulatory  
124 effects on herbivores. *Euphorbia* diterpenoids are known to exhibit immunomodulatory  
125 activities through the selective modulation of protein kinase C (PKC) (26, 27). Therefore, we  
126 evaluated the modulation of PKC by measuring the capacity of small extract fractions,  
127 corresponding to compounds or compound groups in each of the 43 *Euphorbia* species, that  
128 modulate *in vitro* TNF- $\alpha$  release from peripheral blood mononuclear cells (PBMCs). To  
129 pinpoint the role of *Euphorbia* diterpenoids involved with TNF- $\alpha$  modulating properties, we  
130 tested for correlation between the number of bioactive fractions and the number of molecules  
131 within the previously annotated chemical classes using phylogenetic generalized least squares  
132 regression analysis (PGLS). The association between the number of TNF- $\alpha$  modulating  
133 fractions and the number of *Euphorbia* diterpenoids is significant ( $P$ -value: 0.02) (Fig. 1B,  
134 Fig. 1C, Table S1). Besides the *Euphorbia* diterpenoids, we also observe significant  
135 associations ( $P$ -value < 0.05) between the number of TNF- $\alpha$  modulating fractions and the  
136 number of overall diterpenoids and glycosyl glycerols with the best fit observed for the  
137 *Euphorbia* diterpenoids (Fig. 1B, Fig. 1C, Fig. S12, Table S1), supporting our hypothesis of  
138 the ecological function of *Euphorbia* diterpenoids as immunomodulatory defense molecules.

139

140 To evaluate the possibility of *Euphorbia* diterpenoids being produced as a response to  
141 local plant-predator interactions, we compiled a dataset of known *Euphorbia* herbivores from  
142 the literature (23). Several hawkmoth species of the genus *Hyles* were found to be highly  
143 specialized predators of *Euphorbia* (5, 28). They have been shown to exhibit host specificity  
144 and to tolerate the highly toxic *Euphorbia* diterpenoids, which they reuse as a defense strategy  
145 against their own predators by regurgitating plant material from the gut (5, 8). Native species  
146 distribution data suggests a close co-occurrence of *Euphorbia*-feeding *Hyles* species with the  
147 chemically highly diverse and biologically active European species of subgenus *Esula* (Fig.  
148 1A), and an absence in the American habitats of the chemically less diverse and biologically  
149 little active representatives of subgenus *Chamaesyce*. However, our data also suggests that  
150 African members of subgenus *Athymalus* and subgenus *Euphorbia* occurring in Southern  
151 Africa and Madagascar, outside of the distribution range of *Euphorbia*-feeding *Hyles*, produce  
152 a high diversity of feeding deterrent diterpenoids (Fig. 1). Thus, we speculate, that previously  
153 not described (or extinct) generalist or specialist *Euphorbia*-feeding herbivores occur (or  
154 occurred) in these regions, which contributed to maintaining adaptive pressure. The black  
155 rhinoceros, *Diceros bicornis* L. distributed in the southern African subregion, for example,  
156 was found to feed often and extensively on African *Euphorbia* species of subgenus *Euphorbia*  
157 (29). Anecdotal evidence of the lack of specialized herbivores in the Americas supports our  
158 results. A single hawkmoth species, *Hyles euphorbiae*, was only introduced recently to North  
159 America (5), where it was used as a host-specific enemy and biological control for the

160 reportedly highly invasive European species of subgenus *Esula* (*E. cyparissias* and *E. esula*),  
161 lacking predators in the newly occupied habitats. Furthermore, although the poinsettia (*E.*  
162 *pulcherrima* Willd. ex Klotzsch), a very well-known house plant and American representative  
163 of subgenus *Chamaesyce*, is notorious for its “extreme toxicity” among the general public,  
164 toxicity remains unconfirmed in the clinic, as 92.4% of patients exposed to the plant did not  
165 develop adverse effects (30), corroborating the low chemical diversity and immunomodulatory  
166 activity observed here.

167

168 In contempt of the limited knowledge about *Euphorbia* herbivory, the remarkable  
169 immunomodulatory activities of the *Euphorbia* diterpenoids provide an indirect way to assess  
170 chemical defense against predators. The differential biosynthesis of diterpenoids in species  
171 geographically separated through evolutionary time, suggests differential exposure to  
172 herbivory during the biogeographic history of the genus. Indeed, there are no known  
173 herbivores of the American species, while specialized herbivores are well documented for the  
174 European and African species (8, 29). The mechanism of predator tolerance is not known, but  
175 the presence of specialized herbivores is consistent with our results and hypothesis that the  
176 greater the diversity of herbivores feeding on a plant species, the more immunomodulating  
177 molecules the plants produce.

178

## 179 **References and Notes:**

- 180 1. J. W. Horn, Z. Xi, R. Riina, J. A. Peirson, Y. Yang, B. L. Dorsey, P. E. Berry, K. J.  
181 Wurdack, Evolutionary bursts in *Euphorbia* (Euphorbiaceae) are linked with  
182 photosynthetic pathway. *Evolution* **68**, 3485–3504 (2014).
- 183 2. J. W. Horn, B. W. van Ee, J. J. Morawetz, R. Riina, V. W. Steinmann, P. E. Berry, K. J.  
184 Wurdack, Phylogenetics and the evolution of major structural characters in the giant genus  
185 *Euphorbia* L. (Euphorbiaceae). *Mol. Phylogenetics Evol.* **63**, 305–326 (2012).
- 186 3. A. Vasas, J. Hohmann, *Euphorbia* diterpenes: isolation, structure, biological activity, and  
187 synthesis (2008-2012). *Chem. Rev.* **114**, 8579-8612 (2014).
- 188 4. Q. W. Shi, X. H. Su, H. Kiyota, Chemical and pharmacological research of the plants in  
189 genus *Euphorbia*. *Chem. Rev.* **108**, 4295-4327 (2008).
- 190 5. S. W. T. Batra, Establishment of *Hyles euphorbiae* (L.) (Lepidoptera: Sphingidae) in the  
191 United States for control of the weedy spurge *Euphorbia esula* L. and *E. cyparissias* L. *J.*  
192 *N. Y. Entomol. Soc.* **91**, 304–311 (1983).
- 193 6. J. Hua, Y. Liu, C.-J. Xiao, S.-X. Jing, S.-H. Luo, S.-H. Li, Chemical profile and defensive  
194 function of the latex of *Euphorbia peplus*. *Phytochemistry* **136**, 56-64 (2017).
- 195 7. C.-S. Huang, S.-H. Luo, Y.-L. Li, C.-H. Li, J. Hua, Y. Liu, S.-X. Jing, Y. Wang, M.-J.  
196 Yang, S.-H. Li, Antifeedant and antiviral diterpenoids from the fresh roots of *Euphorbia*  
197 *jolkinii*. *Nat. Prod. Bioprospect.* **4**, 91-100 (2014).
- 198 8. A. K. Hundsdorfer, J. N. Tshibangu, B. Wetterauer, M. Wink, Sequestration of phorbol  
199 esters by aposematic larvae of *Hyles euphorbiae* (Lepidoptera: Sphingidae)?  
200 *Chemoecology* **15**, 261–267 (2005).
- 201 9. J. X. Becerra, The impact of herbivore–plant coevolution on plant community structure.  
202 *Proc. Natl. Acad. Sci. U S A* **104**, 7483–7488 (2007).

- 203 10. P. R. Ehrlich, P. H. Raven, Butterflies and plants: A study in coevolution. *Evolution* **18**,  
204 586–608 (1964).
- 205 11. L. A. Richards, L. A. Dyer, M. L. Forister, A. M. Smilanich, C. D. Dodson, M. D.  
206 Leonard, C. S. Jeffrey. Phytochemical diversity drives plant–insect community diversity.  
207 *Proc. Natl. Acad. Sci. U S A* **112**, 10973–10978 (2015).
- 208 12. R. D. Firn, C. G. Jones, Natural products - a simple model to explain chemical diversity.  
209 *Nat. Prod. Rep.* **20**, 382–391 (2003).
- 210 13. C. G. Jones, R. D. Firn, S. B. Malcolm, On the evolution of plant secondary chemical  
211 diversity. *Phil. Trans. R. Soc. Lond. B.* **333**, 273-280 (1991).
- 212 14. M. Wang et al., Sharing and community curation of mass spectrometry data with Global  
213 Natural Products Social Molecular Networking. *Nat. Biotechnol.* **34**, 828-837 (2016).
- 214 15. J. Watrous, P. Roach, T. Alexandrov, B. S. Heath, J. Y. Yang, R. D. Kersten, M. van der  
215 Voort, K. Pogliano, H. Gross, J. M. Raaijmakers, B. S. Moore, J. Laskin, N. Bandeira, P.  
216 C. Dorrestein, Mass spectral molecular networking of living microbial colonies. *Proc.*  
217 *Natl. Acad. Sci. U S A* **109**, E1743–E1752 (2012).
- 218 16. B. E. Sedio, J. C. Rojas Echeverri, P. Boya, S. J. Wright, Sources of variation in foliar  
219 secondary chemistry in a tropical forest tree community. *Ecology* **98**, 616–623 (2017).
- 220 17. K. Dührkop, S. Böcker, Fragmentation trees reloaded. *J. Cheminform.* **8**, 5 (2016).
- 221 18. K. Dührkop, H. Shen, M. Meusel, J. Rousu, S. Böcker, Searching structure databases using  
222 CSI:FingerID. *Proc. Natl. Acad. Sci. U S A* **112**, 12580-12585 (2015).
- 223 19. R. R. da Silva, M. Wang, L.-F. Nothias, J. J. van der Hooft, A. M. Caraballo- Rodriguez,  
224 E. Fox, M. J. Balunas, J. L. Klassen, N. P. Lopes, P. C. Dorrestein, Propagating  
225 annotations of molecular networks using in silico fragmentation. *PLoS Comput. Biol.* **14**,  
226 e1006089 (2018).
- 227 20. J. J. J. van der Hooft, J. Wandy, M. P. Barrett, K. E. V. Burgess, S. Rogers, Topic  
228 modeling for untargeted substructure exploration in metabolomics. *Proc. Natl. Acad. Sci.*  
229 *U S A* **113**, 13738-13743 (2016).
- 230 21. J. Wandy, Y. Zhu, J. J. J. van der Hooft, R. Daly, M. P. Barrett, S. Rogers, Ms2lda.org:  
231 web-based topic modelling for substructure discovery in mass spectrometry.  
232 *Bioinformatics* **34**, 317-318 (2018).
- 233 22. Y. Djoumbou Feunang, R. Eisner, C. Knox, L. Chepelev, J. Hastings, G. Owen, E. Fahy,  
234 C. Steinbeck, S. Subramanian, E. Bolton, R. Greiner, D. S. Wishart, Classyfire: automated  
235 chemical classification with a comprehensive, computable taxonomy. *J. Cheminform.* **8**, 61  
236 (2016).
- 237 23. Materials and methods are available as supplementary materials.
- 238 24. L. W. Sumner, A. Amberg, D. Barrett, M. H. Beale, R. Beger, C. A. Daykin, T. W.-M.  
239 Fan, O. Fiehn, R. Goodacre, J. L. Griffin, T. Hankemeier, N. Hardy, J. Harnly, R. Higashi,  
240 J. Kopka, A. N. Lane, J. C. Lindon, P. Marriott, A. W. Nicholls, M. D. Reily, J. J. Thaden,  
241 M. R. Viant, Proposed minimum reporting standards for chemical analysis Chemical  
242 Analysis Working Group (CAWG) Metabolomics Standards Initiative (MSI).  
243 *Metabolomics* **3**, 211-221 (2007).
- 244 25. L.-F. Nothias-Scaglia, I. Schmitz-Afonso, F. Renucci, F. Roussi, D. Touboul, J. Costa, M.  
245 Litaudon, J. Paolini, Insights on profiling of phorbol, deoxyphorbol, ingenol and  
246 jatrophane diterpene esters by high performance liquid chromatography coupled to  
247 multiple stage mass spectrometry. *J. Chromatogr. A* **1422**, 128–139 (2015).

- 248 26. B. Berman, New developments in the treatment of actinic keratosis: focus on ingenol  
249 mebutate gel. *Clin. Cosmet. Investig. Dermatol.* **20**, 111–122 (2012).
- 250 27. S. E. Smith, B. S. Meldrum, The protein kinase C activators, phorbol 12-myristate,13-  
251 acetate and phorbol 12,13-dibutyrate, are convulsant in the pico- nanomolar range in mice.  
252 *Eur. J. Pharmacol.* **213**, 133-135 (1992).
- 253 28. A. K. Hundsdoerfer, D. Rubinoff, M. Attié, M. Wink, I. J. Kitching, A revised molecular  
254 phylogeny of the globally distributed hawkmoth genus *Hyles* (Lepidoptera: Sphingidae),  
255 based on mitochondrial and nuclear DNA sequences. *Molecular Phylogenetics and*  
256 *Evolution* **52**, 852-865 (2009).
- 257 29. B. D. Loutit, G. N. Louw, M. K. Seeley, First approximation of food preferences and the  
258 chemical composition of the diet of the desert-dwelling black rhinoceros, *Diceros bicornis*  
259 *L. Madoqua* **15**, 35-54 (1987).
- 260 30. E. P. Krenzelok, T. D. Jacobsen, J. M. Aronis, Poinsettia exposures have good outcomes...  
261 just as we thought. *Am. J. Emerg. Med.* **14**, 671-674 (1996).
- 262 31. G. Vogg, S. Achatz, A. Kettrup, H. Sandermann Jr., Fast, sensitive and selective liquid  
263 chromatographic-tandem mass spectrometric determination of tumor-promoting diterpene  
264 esters. *J. Chromatogr. A* **855**, 563-573 (1999).
- 265 32. G. Appendino, “Ingenane diterpenoids” in *Progress in the Chemistry of Organic Natural*  
266 *Products 102*, A. D. Kinghorn, H. Falk, S. Gibbons, J. Kobayashi, Eds. (Springer, 2016).
- 267 33. S. A. Adamo, “Bidirectional connections between the immune system and the nervous  
268 system in insects” in *Insect Immunology*, N. E. Beckage, Ed. (Elsevier, 2008).
- 269 34. S. G. Wubshet, J. S. Schmidt, S. Wiese, D. Staerk, High-resolution screening combined  
270 with HPLC-HRMS-SPE-NMR for identification of potential health-promoting constituents  
271 in Sea Aster and Searocket - New Nordic Food Ingredients. *J. Agric. Food Chem.* **61**,  
272 8616–8623 (2013).
- 273 35. J.-H. Zhang, T. D. Y. Chung, K. R. Oldenburg, A simple statistical parameter for use in  
274 evaluation and validation of high throughput screening assays. *J. Biomol. Screen.* **4**, 67–73  
275 (1999).
- 276 36. A. Birmingham, L. M. Selfors, T. Forster, D. Wrobel, J. C. Kennedy, E. Shanks, J.  
277 Santoyo-Lopez, D. J. Dunican, A. Long, D. Kelleher, Q. Smith, R. L. Beijersbergen, P.  
278 Ghazal, C. E. Shamu, Statistical methods for analysis of high-throughput RNA interference  
279 screens. *Nat. Methods* **6**, 569–575 (2009).
- 280 37. I. Protsyuk, A. Melnik, L.-F. Nothias, L. Rappez, P. Phapale, A. Aksenov, A. Bouslimani,  
281 S. Ryazanov, P. C. Dorrestein, T. Alexandrov, 3d molecular cartography using LC–MS  
282 facilitated by Optimus and ’ili software. *Nat. Protoc.* **13**, 134–154 (2018).
- 283 38. H. L. Röst, T. Sachsenberg, S. Aiche, C. Bielow, H. Weisser, F. Aicheler, S. Andreotti, H.-  
284 C. Ehrlich, P. Gutenbrunner, E. Kenar, X. Liang, S. Nahnsen, L. Nilse, J. Pfeuffer, G.  
285 Rosenberger, M. Rurik, U. Schmitt, J. Veit, M. Walzer, D. Wojnar, W. E. Wolski, O.  
286 Schilling, J. S. Choudhary, L. Malmström, R. Aebersold, K. Reinert, O. Kohlbacher,  
287 OpenMS: A flexible open-source software platform for mass spectrometry data analysis.  
288 *Nat. Methods* **13**, 741-748 (2016).
- 289 39. P. Shannon, A. Markiel, O. Ozier, N. S. Baliga, J. T. Wang, D. Ramage, N. Amin, B.,  
290 Schwikowski, T. Ideker, Cytoscape: A software environment for integrated models of  
291 biomolecular interaction networks. *Genome Res.* **13**, 2498–2504 (2003).

- 292 40. T. Pluskal, S. Castillo, A. Villar-Briones, M. Orešič, MZmine 2: Modular framework for  
293 processing, visualizing, and analyzing mass spectrometry-based molecular profile data.  
294 *BMC Bioinformatics* **11**, 395 (2010).
- 295 41. P. Cignoni, M. Callieri, M. Corsini, M. Dellepiane, F. Ganovelli, G. Ranzuglia, MeshLab:  
296 an open-source mesh processing tool. *Sixth Eurographics Italian Chapter Conference*,  
297 129-136 (2008).
- 298 42. A. Bouslimani, C. Porto, C. M. Rath, M. Wang, Y. Guo, A. Gonzalez, D. Berg-Lyon, G.  
299 Ackermann, G. J. Moeller Christensen, T. Nakatsuji, L. Zhang, A. W. Borkowski, M. J.  
300 Meehan, K. Dorrestein, R. L. Gallo, N. Bandeira, R. Knight, T. Alexandrov, P. C.  
301 Dorrestein, Molecular cartography of the human skin surface in 3D. *Proc. Natl. Acad. Sci.*  
302 *U S A* **112**, E2120–E2129 (2015).
- 303 43. B. E. Sedio, Recent breakthroughs in metabolomics promise to reveal the cryptic chemical  
304 traits that mediate plant community composition, character evolution and lineage  
305 diversification. *New Phytol.* **214**, 952–958 (2017).
- 306 44. O. L. M. da Silva, I. Cordeiro, *Euphorbia sarcoceras*, a new species of *Euphorbia* sect.  
307 *Alectoroctonum* from Brazil. *Syst. Bot.* **40**, 962–967 (2016).
- 308 45. Y. Yang, R. Riina, J. J. Morawetz, T. Haeevermans, X. Aubriot, P. E. Berry, Molecular  
309 phylogenetics and classification of *Euphorbia* subgenus *Chamaesyce* (Euphorbiaceae).  
310 *TAXON* **61**, 764–789 (2012).
- 311 46. L. J. Revell, phytools: An R package for phylogenetic comparative biology (and other  
312 things). *Methods Ecol. Evol.* **3**, 217–223 (2012).
- 313 47. D. Orme, R. Freckleton, G. Thomas, T. Petzoldt, S. Fritz, N. Isaac, W. Pearse, caper:  
314 Comparative analyses of phylogenetics and evolution in R. R package version 0.5.2.  
315 (2013).
- 316 48. M. R. E. Symonds, S. P. Blomberg, “A Primer on phylogenetic generalised least squares”  
317 in *Modern Phylogenetic Comparative Methods and Their Application in Evolutionary*  
318 *Biology: Concepts and Practice*, L. Z. Garamszegi, Ed. (Springer, 2014).
- 319 49. R. Govaerts, F. J. F. Casas, C. Barker, S. Carter, S. Davies, H.-J. Esser, M. Gilbert, P.  
320 Hoffmann, A. Radcliffe-Smith, V. Steinmann, P. van Welzen, T. Whitmore, World  
321 Checklist of Euphorbiaceae. Facilitated by the Royal Botanic Gardens, Kew, Published on  
322 the Internet; <http://apps.kew.org/wcsp/>, Retrieved 2014-07-25 (2014).
- 323 50. A. K. Hundsdoerfer, I. J. Kitching, M. Wink, The phylogeny of the *Hyles euphorbiae*  
324 complex (Lepidoptera: Sphingidae): Molecular evidence from sequence data and ISSR-  
325 PCR fingerprints. *Org. Divers. Evol.* **5**, 173 – 198 (2005).
- 326 51. J. C. Meerman, Relationships within the *Hyles euphorbiae* complex: a numerical  
327 taxonomy approach (Lepidoptera: Sphingidae). *Entomol. Gaz.* **44**, 205–209 (1993).

328  
329 **Acknowledgments:** The authors thank Ivan Protsyuk and Theodore Alexandrov (EMBL) for  
330 their support in using the KNIME workflow Optimus and MassFuser, Arife Önder for technical  
331 assistance with fractionation, Martin Aarseth-Hansen and Gry Bastholm for assistance with  
332 collecting plant material and co-workers of LEO Pharma for technical assistance with biological  
333 assays. Kevin Nguyen, Brandon Ross and Kirandeep Chhokar (UCSD) are thanked for assistance  
334 with preparing plant extracts for the 3D mass spectral molecular cartography; **Funding:** This  
335 work was supported by the Marie Curie Actions of the 7th European Community Framework  
336 Programme: FP7/2007-2013/, REA grant agreement n 606895-MedPlant to NR and a grant from  
337 the Aase and Ejnar Danielsen Foundation to ME, and the MSCA-IF-2016 n 704786 to LFN.



338 The TNF- $\alpha$  experiments were conducted at and partly funded by LEO Pharma A/S. LC-MS/MS  
339 analyses were funded through the Center for Computational Mass Spectrometry P41 GM103484  
340 and the NIH grant on reuse of metabolomics data R03 CA211211; **Author contributions:** ME,  
341 LFN, CHSL, OMG, HTS, NN, DS, PCD and NR designed the study. ME and KM collected and  
342 sampled *Euphorbia* species from the Botanical Garden at the Natural History Museum of  
343 Denmark. GH and LAF collected seeds of Brazilian *Euphorbia* species and performed  
344 taxonomic circumscription and identification. ME prepared the plant extracts. LFN performed  
345 LC-MS/MS analysis of the pooled *Euphorbia* extracts. ME performed LC-MS/MS analysis for  
346 the 3D mass spectral molecular cartography. ME and LFN performed mass spectral molecular  
347 networking analysis. JJJVDH performed MS2LDA analysis. LFN, JJJVDH and ME annotated  
348 Mass2Motifs on MS2LDA. ME and JJJVDH developed and performed the (semi-)automated  
349 annotation workflow by combining mass spectral molecular networking with MS2LA, *in silico*  
350 annotation and ClassyFire. RRS developed dereplication strategies through NAP and provided  
351 support for data analysis. NN, PL, DS and ME designed the high-resolution bioactivity study.  
352 ME performed the high-resolution bioactivity study and analysed data together with DS, NN and  
353 PL. ME generated the phylogenetic hypothesis, performed comparative analyses and wrote all  
354 scripts used for data analysis. ME wrote the manuscript together with LFN, NR and PCD. All  
355 authors discussed the results and commented on the manuscript. **Competing interests:** Authors  
356 declare no competing interests. **Data and materials availability:** All data, code, and materials to  
357 understand and assess the conclusions of this research are available in the main text,  
358 supplementary materials, and via [https://github.com/DorresteinLaboratory/supplementary-  
359 GlobalEuphorbiaStudy](https://github.com/DorresteinLaboratory/supplementary-GlobalEuphorbiaStudy). LC-MS/MS data are publicly accessible on GNPS under the MassIVE  
360 accession no. MSV000081082 and MSV000081083.

361

## 362 **Supplementary Materials:**

363 Materials and Methods

364 Supplementary Text

365 Table S1

366 Fig S1-S12

367 URL S1

368 Data S1-S2

369 References (31-51)

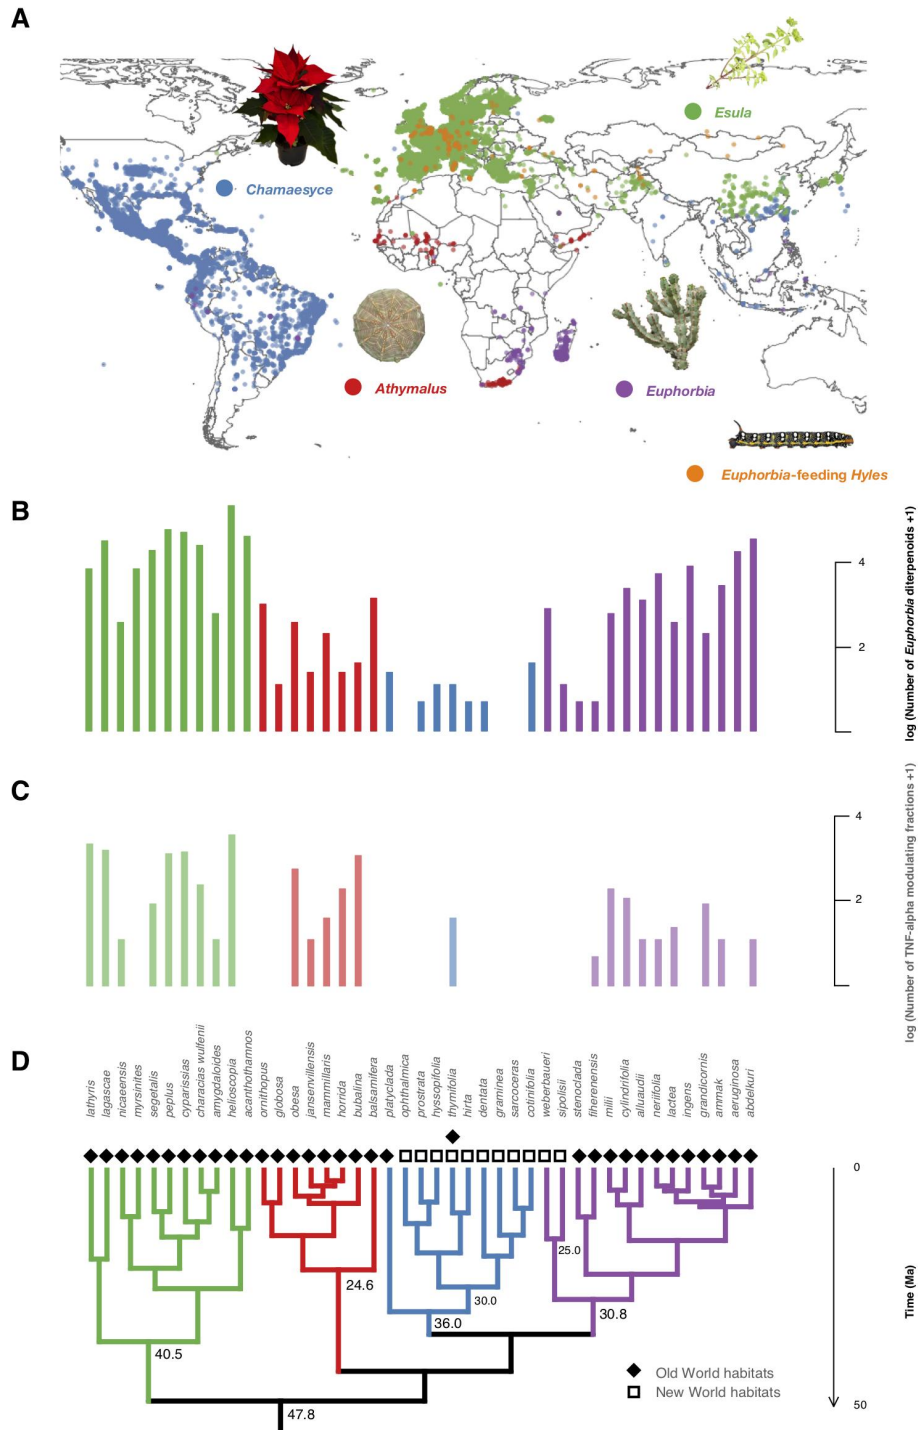

370  
 371 **Fig. 1. Biogeography, phylogenetic relationships, diterpenoid production and**  
 372 **biological activities of representative *Euphorbia* species.** A. Occurrences of *Euphorbia*  
 373 species investigated chemically and *Euphorbia*-feeding *Hyles* moth larvae retrieved from  
 374 GBIF and manually restricted to native areas B. Number of putatively annotated *Euphorbia*  
 375 diterpenoids per species analyzed. C. Number of TNF- $\alpha$  modulating fractions per species

376 analyzed. **D.** *Euphorbia* phylogenetic tree (50% majority rule consensus tree from Bayesian  
377 analysis of 11587 bps of DNA markers spanning all three plant genomes: chloroplast,  
378 mitochondrial, nuclear). Species of subgenus *Esula* exhibit a high number of biologically  
379 active diterpenoids and co-occur with larvae of *Euphorbia*-feeding *Hyles*, whereas the  
380 American radiation of subgenus *Chamaesyce* shows reduced *Euphorbia* diterpenoid  
381 production and TNF- $\alpha$  modulating activity. Subgeneric clades are highlighted with different  
382 colors: *Athymalus* (red), *Chamaesyce* (blue), *Esula* (green), *Euphorbia* (purple).

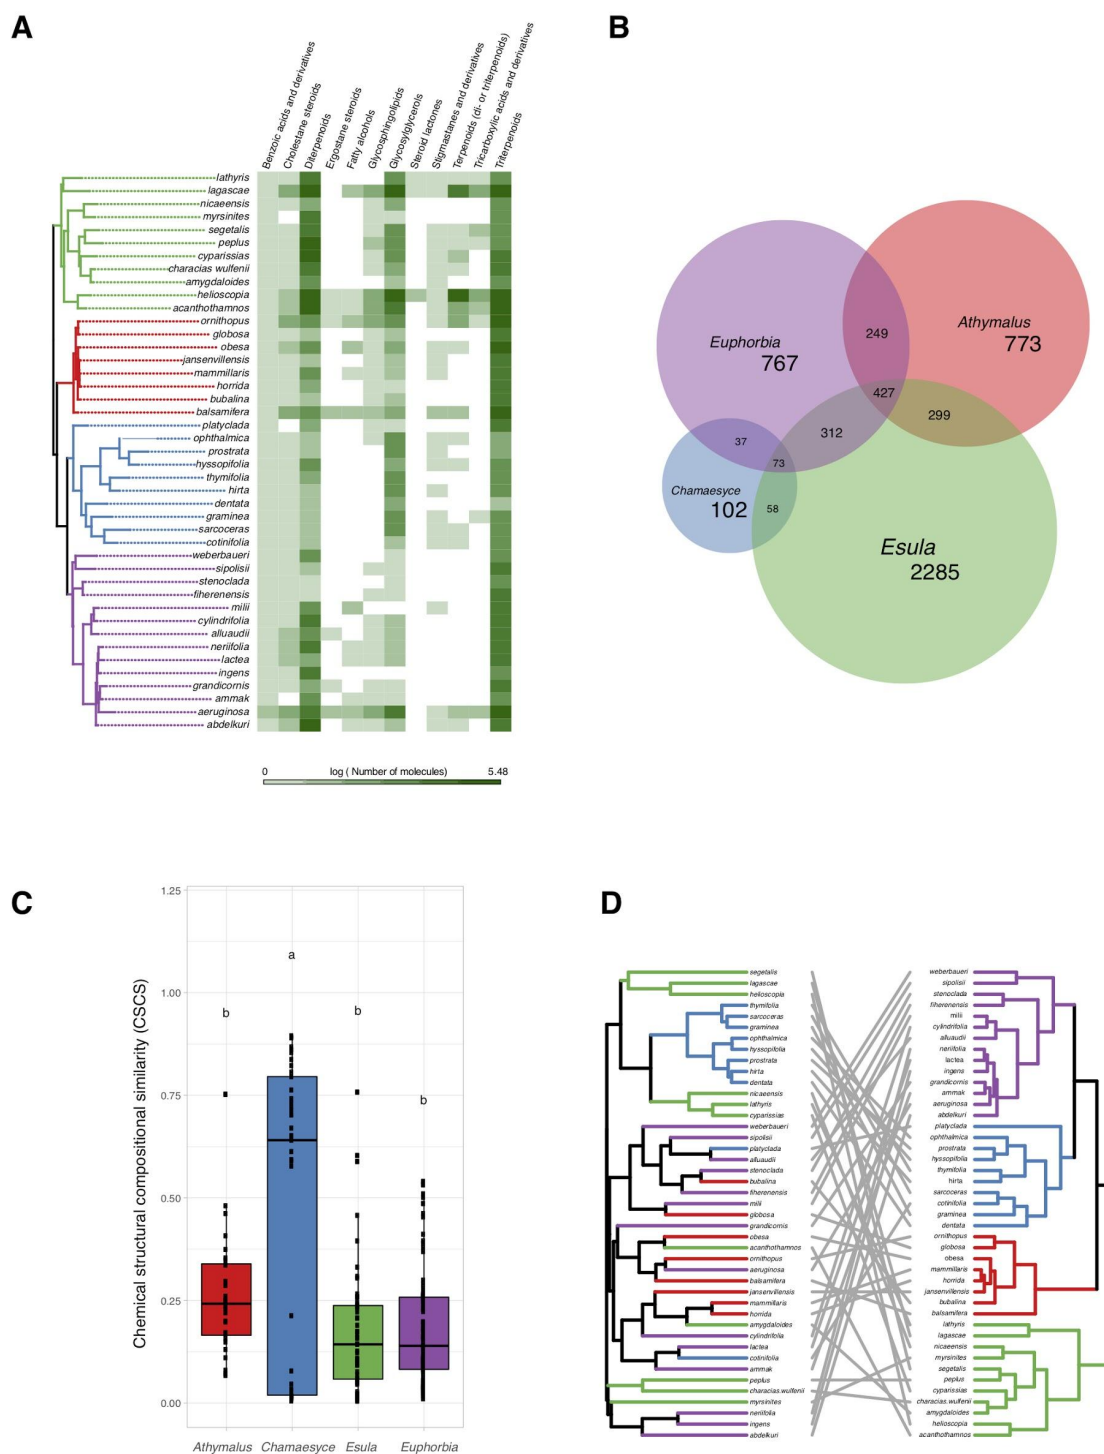

383  
 384 **Fig. 2. Specialized metabolite diversity in *Euphorbia*.** A. Distribution of specialized  
 385 metabolite classes on the *Euphorbia* phylogenetic tree (50% majority rule consensus tree  
 386 from Bayesian analysis of 11587 bps of DNA markers spanning all three plant genomes:  
 387 chloroplast, mitochondrial, nuclear). Chemical classes of *Euphorbia* specialized metabolites  
 388 were identified using a mass spectrometry based workflow combining mass spectral

389 molecular networking, *in silico* annotation, automated chemical classification and  
390 substructure recognition. **B.** Molecular features representing individual mass spectral  
391 molecular network nodes shared across species of *Euphorbia* subgeneric clades. **C.**  
392 Chemical similarity among *Euphorbia* subgeneric clades assessed using the chemical  
393 structural compositional similarity. Compared to subgenera *Athymalus*, *Esula* and  
394 *Euphorbia*, subgenus *Chamaesyce* exhibits very few chemically distinct features and high  
395 chemical structural compositional similarity. **D.** *Euphorbia* chemogram (left) and  
396 phylogenetic tree (right). The chemogram was generated using hierarchical cluster analysis  
397 on the pair-wise chemical structural and compositional dissimilarities of the tandem mass  
398 spectrometry data of the crude extracts using the complete agglomeration method.  
399 Phylogeny and chemogram show low overlap, suggesting that closely related *Euphorbia*  
400 species differ considerably in their chemistry.

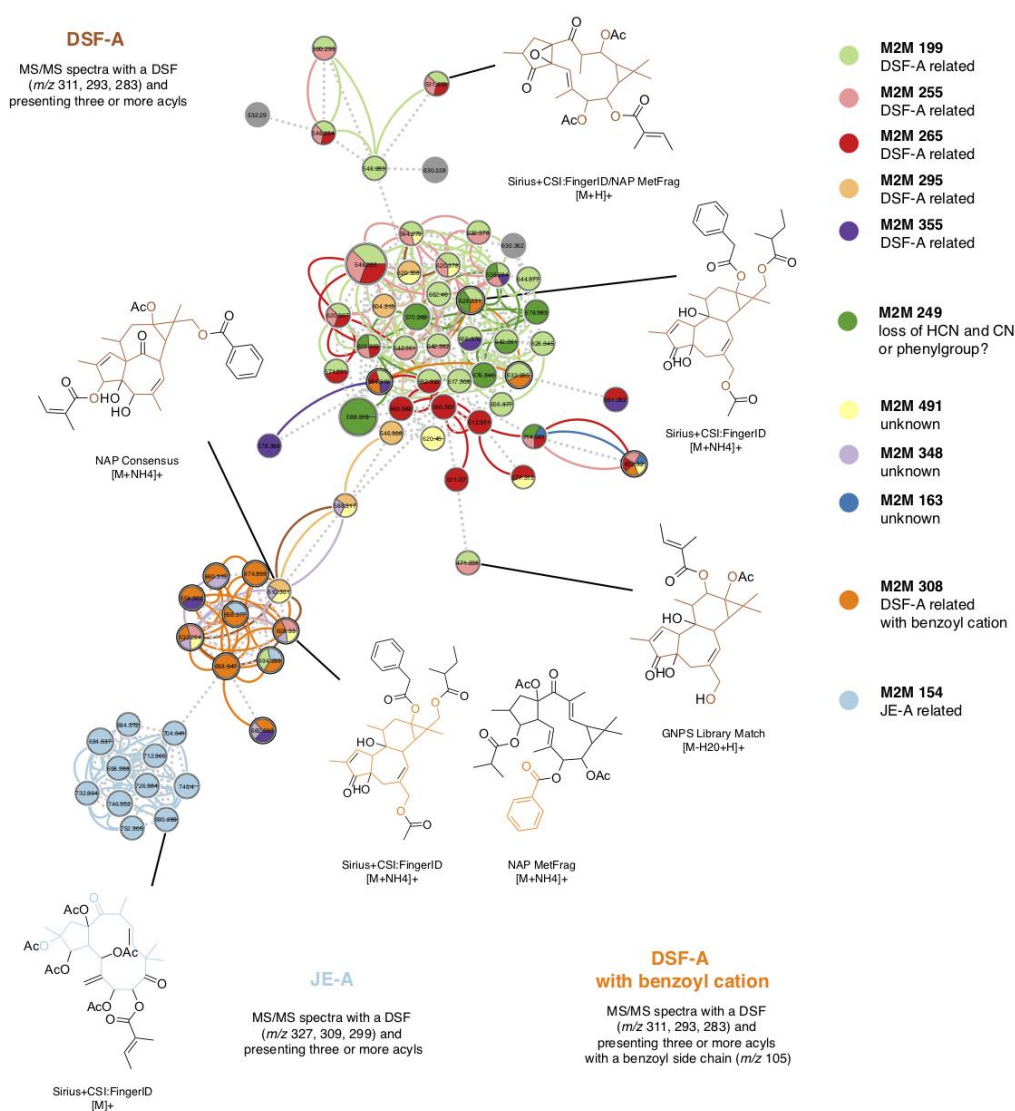

401  
 402 **Fig. 3. Putative identification of chemical compound classes.** We putatively identified  
 403 compound classes within the mass spectral molecular networks by combining *in silico*  
 404 annotation with automated chemical classification and substructure recognition (MS2LDA).  
 405 *Euphorbia* diterpenoids exhibit many isoforms, therefore different diterpene backbone  
 406 skeletons were found within the same molecular family. Matching substructures  
 407 (Mass2Motifs) associated with diterpenoid substructures obtained from matches to  
 408 reference spectra and *in silico* structure annotation enabled the identification of different  
 409 diterpene spectral fingerprints clustered within one molecular family. Node size represents  
 410 the total ion current (TIC) of all samples analyzed, edge colors represent different  
 411 substructures (Mass2Motifs) that are shared across different nodes and dotted lines  
 412 connecting the nodes represent the cosine score. M2M: Mass2Motif, DSF-A: Diterpene  
 413 spectral fingerprint type A, JE-A: Jatropane ester type A.

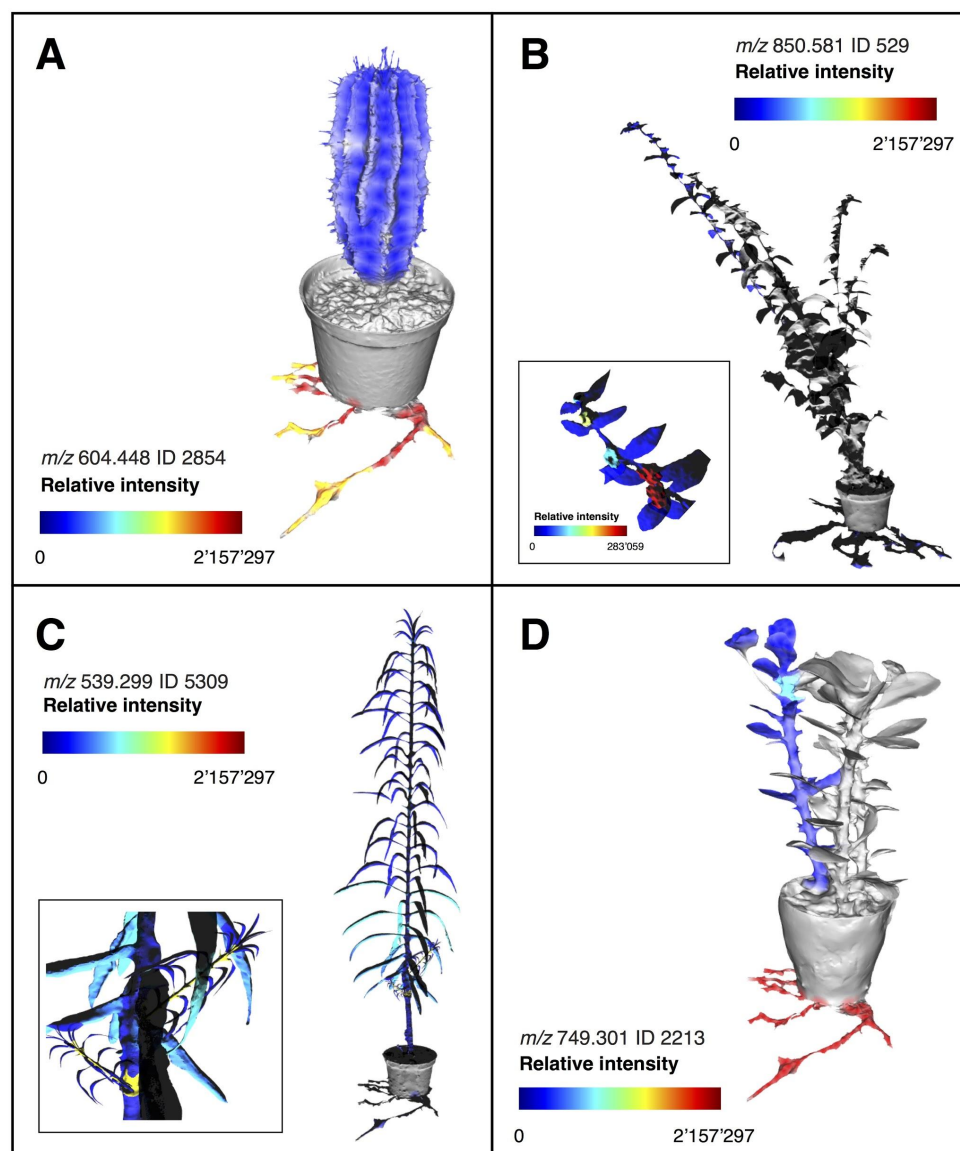

414  
415  
416  
417  
418  
419  
420  
421

**Fig. 4. Molecular maps of selected *Euphorbia* diterpenoids across representatives of each subgeneric clade.** Relative intensity of LC-MS molecular features annotated as *Euphorbia* diterpenoids through spectral matching A. *Euphorbia horrida*, subgenus *Athymalus*, B. *Euphorbia hirta*, subgenus *Chamaesyce*, C. *Euphorbia lathyris*, subgenus *Esula* and D. *Euphorbia milii* var. *hislopilii*, subgenus *Euphorbia*. For interactive cartographical snapshots see URL S1, links 1-15. The 3D images are for illustrative purposes only and do not represent exact locations of sample collection.
